# Supplementary material for: Economic Analysis of Children’s Surgical Care in Low- and Middle-Income Countries: A Systematic Review and Analysis
Source: PubMed Central journal article supplement (PMC5085034; doi:10.1371/journal.pone.0165480), 2016-10-28
Supplement: pone.0165480.s002.pdf [file pone.0165480.s002.pdf]

## S1 Table: Database Search Terms

### Database 1- Pubmed

| Set Number    | Search Terms for Pubmed                                                                                                                                                                                                                                                                                                                                                                                                                                                                                                                                                                                                                                                                                                                                                                                                                                                                                                                                                                                                                                                                                                                                                                                                                                                                                                                                                                                                                                                                                                                                                                                                                                                                                                                                                                                                                                                                                                                                                                                                                                                                                                                                                                                                                                                                                                                                                                                                                                                                                                                                                                                                                                                                                                                                                                                                                                                                                                                                                                                                                                                                                                                                                                                                                                                                                   | Results   |
|---------------|-----------------------------------------------------------------------------------------------------------------------------------------------------------------------------------------------------------------------------------------------------------------------------------------------------------------------------------------------------------------------------------------------------------------------------------------------------------------------------------------------------------------------------------------------------------------------------------------------------------------------------------------------------------------------------------------------------------------------------------------------------------------------------------------------------------------------------------------------------------------------------------------------------------------------------------------------------------------------------------------------------------------------------------------------------------------------------------------------------------------------------------------------------------------------------------------------------------------------------------------------------------------------------------------------------------------------------------------------------------------------------------------------------------------------------------------------------------------------------------------------------------------------------------------------------------------------------------------------------------------------------------------------------------------------------------------------------------------------------------------------------------------------------------------------------------------------------------------------------------------------------------------------------------------------------------------------------------------------------------------------------------------------------------------------------------------------------------------------------------------------------------------------------------------------------------------------------------------------------------------------------------------------------------------------------------------------------------------------------------------------------------------------------------------------------------------------------------------------------------------------------------------------------------------------------------------------------------------------------------------------------------------------------------------------------------------------------------------------------------------------------------------------------------------------------------------------------------------------------------------------------------------------------------------------------------------------------------------------------------------------------------------------------------------------------------------------------------------------------------------------------------------------------------------------------------------------------------------------------------------------------------------------------------------------------------|-----------|
| 1. Pediatrics | ("Pediatrics"[Mesh] OR "Adolescent"[Mesh] OR "Child"[Mesh] OR "Infant"[Mesh] OR infant[tiab] OR neonat*[tiab] OR child[tiab] OR children[tiab] OR pediatric[tiab] OR adolescent*[tiab] OR teenage*[tiab] OR teen[tiab] OR teens[tiab] OR youth[tiab] OR youths[tiab] OR kid[tiab] OR kids[tiab])                                                                                                                                                                                                                                                                                                                                                                                                                                                                                                                                                                                                                                                                                                                                                                                                                                                                                                                                                                                                                                                                                                                                                                                                                                                                                                                                                                                                                                                                                                                                                                                                                                                                                                                                                                                                                                                                                                                                                                                                                                                                                                                                                                                                                                                                                                                                                                                                                                                                                                                                                                                                                                                                                                                                                                                                                                                                                                                                                                                                          | 3,233,386 |
| 2. Surgery    | "Surgical Procedures, Operative"[Mesh] OR "surgery" [Subheading] OR "surgery"[tiab] OR "surgical"[tiab] OR "Hernia, Inguinal"[Mesh] OR "Testicular Hydrocele"[Mesh] OR "Cleft Lip"[Mesh] OR "Cleft Palate"[Mesh] OR "Cataract"[Mesh] OR "Anus, Imperforate"[Mesh]                                                                                                                                                                                                                                                                                                                                                                                                                                                                                                                                                                                                                                                                                                                                                                                                                                                                                                                                                                                                                                                                                                                                                                                                                                                                                                                                                                                                                                                                                                                                                                                                                                                                                                                                                                                                                                                                                                                                                                                                                                                                                                                                                                                                                                                                                                                                                                                                                                                                                                                                                                                                                                                                                                                                                                                                                                                                                                                                                                                                                                         | 3,457,007 |
| 3. LMIC       | ("Developing Countries"[Mesh] OR Africa[Mesh] OR "Central America"[Mesh] OR "American Samoa"[tiab] OR "Cambodia"[tiab] OR "China" [tiab] OR "Fiji"[tiab] OR "Indonesia"[tiab] OR "Kiribati"[tiab] OR "Korea"[tiab] OR "Lao"[tiab] OR "Malaysia"[tiab] OR "Marshall Islands"[tiab] OR "Micronesia"[tiab] OR "Mongolia"[tiab] OR "Myanmar"[tiab] OR "Palau"[tiab] OR "Papua New Guinea"[tiab] OR "Philippines"[tiab] OR "Samoa"[tiab] OR "Solomon Islands"[tiab] OR "Thailand"[tiab] OR "Timor-Leste"[tiab] OR "Tuvalu"[tiab] OR "Tonga"[tiab] OR "Vanuatu"[tiab] OR "Vietnam"[tiab] OR "Albania"[tiab] OR "Armenia"[tiab] OR "Azerbaijan"[tiab] OR "Belarus"[tiab] OR "Bosnia"[tiab] OR "Bulgaria"[tiab] OR "Georgia"[tiab] OR "Hungary"[tiab] OR "Kazakhstan"[tiab] OR "Kosovo"[tiab] OR "Kyrgyz Republic"[tiab] OR "Macedonia"[tiab] OR "Moldova"[tiab] OR "Montenegro"[tiab] OR "Romania"[tiab] OR "Serbia"[tiab] OR "Tajikistan"[tiab] OR "Turkey"[tiab] OR "Turkmenistan"[tiab] OR "Ukraine"[tiab] OR "Uzbekistan"[tiab] OR "Argentina"[tiab] OR "Belize"[tiab] OR "Bolivia"[tiab] OR "Brazil"[tiab] OR "Colombia"[tiab] OR "Costa Rica"[tiab] OR "Cuba"[tiab] OR "Dominica"[tiab] OR "Dominican Republic"[tiab] OR "Ecuador"[tiab] OR "El Salvador"[tiab] OR "Grenada"[tiab] OR "Guatemala"[tiab] OR "Guyana"[tiab] OR "Haiti"[tiab] OR "Honduras"[tiab] OR "Jamaica"[tiab] OR "Mexico"[tiab] OR "Nicaragua"[tiab] OR "Panama"[tiab] OR "Paraguay"[tiab] OR "Peru"[tiab] OR "St. Lucia"[tiab] OR "St. Vincent"[tiab] OR "Suriname"[tiab] OR "Venezuela"[tiab] OR "Algeria"[tiab] OR "Djibouti"[tiab] OR "Egypt"[tiab] OR "Iran"[tiab] OR "Iraq"[tiab] OR "Jordan"[tiab] OR "Lebanon"[tiab] OR "Libya"[tiab] OR "Morocco"[tiab] OR "Syria*"[tiab] OR "Tunisia"[tiab] OR "West Bank and Gaza"[tiab] OR "Yemen"[tiab] OR "Afghanistan"[tiab] OR "Bangladesh"[tiab] OR "Bhutan"[tiab] OR "India"[tiab] OR "Maldives"[tiab] OR "Nepal"[tiab] OR "Pakistan"[tiab] OR "Sri Lanka"[tiab] OR "Angola"[tiab] OR "Benin"[tiab] OR "Botswana"[tiab] OR "Burkina Faso"[tiab] OR "Burundi"[tiab] OR "Cameroon"[tiab] OR "Cabo Verde"[tiab] OR "Central African Republic"[tiab] OR "Chad"[tiab] OR "Comoros"[tiab] OR "Congo"[tiab] OR "Cote d'Ivoire"[tiab] OR "Ivory Coast"[tiab] OR "Eritrea"[tiab] OR "Ethiopia"[tiab] OR "Gabon"[tiab] OR "Gambia"[tiab] OR "Ghana"[tiab] OR "Guinea"[tiab] OR "Guinea-Bissau"[tiab] OR "Kenya"[tiab] OR "Lesotho"[tiab] OR "Liberia"[tiab] OR "Madagascar"[tiab] OR "Malawi"[tiab] OR "Mali"[tiab] OR "Mauritania"[tiab] OR "Mauritius"[tiab] OR "Mozambique"[tiab] OR "Namibia"[tiab] OR "Niger"[tiab] OR "Nigeria"[tiab] OR "Rwanda"[tiab] OR "São Tomé and Príncipe"[tiab] OR "Senegal"[tiab] OR "Seychelles"[tiab] OR "Sierra Leone"[tiab] OR "Somalia"[tiab] OR "South Africa"[tiab] OR "South Sudan"[tiab] OR "Sudan"[tiab] OR "Swaziland"[tiab] OR "Tanzania"[tiab] OR "Togo"[tiab] OR "Uganda"[tiab] OR "Zambia"[tiab] OR "Zimbabwe" OR "low resource"[tiab] OR "under-resourced"[tiab] OR "resource poor"[tiab] OR "under-developed"[tiab] OR "underdeveloped"[tiab] OR "developing country"[tiab] OR "developing countries"[tiab] OR "developing world"[tiab] OR "third world"[tiab] OR global[tiab] OR lmic[tiab] OR (low[tiab] AND middle[tiab] AND income[tiab]) | 1,005,679 |
| 4. STEP 1     | 1&2&3                                                                                                                                                                                                                                                                                                                                                                                                                                                                                                                                                                                                                                                                                                                                                                                                                                                                                                                                                                                                                                                                                                                                                                                                                                                                                                                                                                                                                                                                                                                                                                                                                                                                                                                                                                                                                                                                                                                                                                                                                                                                                                                                                                                                                                                                                                                                                                                                                                                                                                                                                                                                                                                                                                                                                                                                                                                                                                                                                                                                                                                                                                                                                                                                                                                                                                     | 23,833    |
| 5. Econ       | ("Costs and Cost Analysis"[Mesh]) OR "economics" [Subheading] OR "life year"[tiab] OR "life years"[tiab] OR "cost"[tiab] OR "costs"[tiab] OR "economic"[tiab] OR economics[tiab] OR "price"[tiab] OR "income"[tiab]                                                                                                                                                                                                                                                                                                                                                                                                                                                                                                                                                                                                                                                                                                                                                                                                                                                                                                                                                                                                                                                                                                                                                                                                                                                                                                                                                                                                                                                                                                                                                                                                                                                                                                                                                                                                                                                                                                                                                                                                                                                                                                                                                                                                                                                                                                                                                                                                                                                                                                                                                                                                                                                                                                                                                                                                                                                                                                                                                                                                                                                                                       | 742,588   |
| 6. STEP 2     | 4&5                                                                                                                                                                                                                                                                                                                                                                                                                                                                                                                                                                                                                                                                                                                                                                                                                                                                                                                                                                                                                                                                                                                                                                                                                                                                                                                                                                                                                                                                                                                                                                                                                                                                                                                                                                                                                                                                                                                                                                                                                                                                                                                                                                                                                                                                                                                                                                                                                                                                                                                                                                                                                                                                                                                                                                                                                                                                                                                                                                                                                                                                                                                                                                                                                                                                                                       | 2,258     |

Database 2- Embase

| Set Number    | Search Terms for Embase                                                                                                                                                                                                                                                                                                                                                                                                                                                                                                                                                                                                                                                                                                                                                                                                                                                                                                                                                                                                                                                                                                                                                                                                                                                                                                                                                                                                                                                                                                                                                                                                                                                                                                                                                                                                                                                                                                                                                                                                                                                                                                                                                                                                                                                                                                                                                                                                                                                                                                                                                                                                                                                                                                                                                                                                                                                                                                                                                                                                                                                                                                                                                                                                                                                              | Results   |
|---------------|--------------------------------------------------------------------------------------------------------------------------------------------------------------------------------------------------------------------------------------------------------------------------------------------------------------------------------------------------------------------------------------------------------------------------------------------------------------------------------------------------------------------------------------------------------------------------------------------------------------------------------------------------------------------------------------------------------------------------------------------------------------------------------------------------------------------------------------------------------------------------------------------------------------------------------------------------------------------------------------------------------------------------------------------------------------------------------------------------------------------------------------------------------------------------------------------------------------------------------------------------------------------------------------------------------------------------------------------------------------------------------------------------------------------------------------------------------------------------------------------------------------------------------------------------------------------------------------------------------------------------------------------------------------------------------------------------------------------------------------------------------------------------------------------------------------------------------------------------------------------------------------------------------------------------------------------------------------------------------------------------------------------------------------------------------------------------------------------------------------------------------------------------------------------------------------------------------------------------------------------------------------------------------------------------------------------------------------------------------------------------------------------------------------------------------------------------------------------------------------------------------------------------------------------------------------------------------------------------------------------------------------------------------------------------------------------------------------------------------------------------------------------------------------------------------------------------------------------------------------------------------------------------------------------------------------------------------------------------------------------------------------------------------------------------------------------------------------------------------------------------------------------------------------------------------------------------------------------------------------------------------------------------------------|-----------|
| 1. Pediatrics | 'pediatrics'/exp OR 'juvenile'/exp OR infant;ab,ti OR neonat*;ab,ti OR child;ab,ti OR children;ab,ti OR pediatric;ab,ti OR adolescent*;ab,ti OR teenage*;ab,ti OR teen;ab,ti OR teens;ab,ti OR youth;ab,ti OR youths;ab,ti OR kid;ab,ti OR kids;ab,ti                                                                                                                                                                                                                                                                                                                                                                                                                                                                                                                                                                                                                                                                                                                                                                                                                                                                                                                                                                                                                                                                                                                                                                                                                                                                                                                                                                                                                                                                                                                                                                                                                                                                                                                                                                                                                                                                                                                                                                                                                                                                                                                                                                                                                                                                                                                                                                                                                                                                                                                                                                                                                                                                                                                                                                                                                                                                                                                                                                                                                                | 2,968,715 |
| 2. Surgery    | 'surgery'/exp OR 'surgery':lnk OR 'inguinal hernia'/exp OR 'hydrocele'/exp OR 'cleft lip'/exp OR 'cleft palate'/exp OR 'cataract'/exp OR 'anorectal malformation'/exp OR 'surgery':ab,ti OR 'surgical':ab,ti OR surgically;ab,ti OR 'imperforate anus':ab,ti OR 'cleft lip':ab,ti OR 'cleft palate':ab,ti OR hydrocele;ab,ti OR hernia;ab,ti OR cataract;ab,ti OR cataracts;ab,ti                                                                                                                                                                                                                                                                                                                                                                                                                                                                                                                                                                                                                                                                                                                                                                                                                                                                                                                                                                                                                                                                                                                                                                                                                                                                                                                                                                                                                                                                                                                                                                                                                                                                                                                                                                                                                                                                                                                                                                                                                                                                                                                                                                                                                                                                                                                                                                                                                                                                                                                                                                                                                                                                                                                                                                                                                                                                                                    | 4,633,248 |
| 3. LMIC       | 'developing country'/exp OR 'africa'/exp OR 'central america'/exp OR 'american samoa':ab,ti OR 'cambodia':ab,ti OR 'china':ab,ti OR 'fiji':ab,ti OR 'indonesia':ab,ti OR 'kiribati':ab,ti OR 'korea':ab,ti OR 'lao':ab,ti OR 'malaysia':ab,ti OR 'marshall islands':ab,ti OR 'micronesia':ab,ti OR 'mongolia':ab,ti OR 'myanmar':ab,ti OR 'palau':ab,ti OR 'papua new guinea':ab,ti OR 'philippines':ab,ti OR 'samoa':ab,ti OR 'solomon islands':ab,ti OR 'thailand':ab,ti OR 'timor-leste':ab,ti OR 'tuvalu':ab,ti OR 'tonga':ab,ti OR 'vanuatu':ab,ti OR 'vietnam':ab,ti OR 'albania':ab,ti OR 'armenia':ab,ti OR 'azerbaijan':ab,ti OR 'belarus':ab,ti OR 'bosnia':ab,ti OR 'bulgaria':ab,ti OR 'georgia':ab,ti OR 'hungary':ab,ti OR 'kazakhstan':ab,ti OR 'kosovo':ab,ti OR 'kyrgyz republic':ab,ti OR 'macedonia':ab,ti OR 'moldova':ab,ti OR 'montenegro':ab,ti OR 'romania':ab,ti OR 'serbia':ab,ti OR 'tajikistan':ab,ti OR 'turkey':ab,ti OR 'turkmenistan':ab,ti OR 'ukraine':ab,ti OR 'uzbekistan':ab,ti OR 'argentina':ab,ti OR 'belize':ab,ti OR 'bolivia':ab,ti OR 'brazil':ab,ti OR 'colombia':ab,ti OR 'costa rica':ab,ti OR 'cuba':ab,ti OR 'dominica':ab,ti OR 'dominican republic':ab,ti OR 'ecuador':ab,ti OR 'el salvador':ab,ti OR 'grenada':ab,ti OR 'guatemala':ab,ti OR 'guyana':ab,ti OR 'haiti':ab,ti OR 'honduras':ab,ti OR 'jamaica':ab,ti OR 'mexico':ab,ti OR 'nicaragua':ab,ti OR 'panama':ab,ti OR 'paraguay':ab,ti OR 'peru':ab,ti OR 'st. lucia':ab,ti OR 'st. vincent':ab,ti OR 'suriname':ab,ti OR 'venezuela':ab,ti OR 'algeria':ab,ti OR 'djibouti':ab,ti OR 'egypt':ab,ti OR 'iran':ab,ti OR 'iraq':ab,ti OR 'jordan':ab,ti OR 'lebanon':ab,ti OR 'libya':ab,ti OR 'morocco':ab,ti OR 'syria':ab,ti OR 'tunisia':ab,ti OR 'west bank and gaza':ab,ti OR 'yemen':ab,ti OR 'afghanistan':ab,ti OR 'bangladesh':ab,ti OR 'bhutan':ab,ti OR 'india':ab,ti OR 'maldives':ab,ti OR 'nepal':ab,ti OR 'pakistan':ab,ti OR 'sri lanka':ab,ti OR 'angola':ab,ti OR 'benin':ab,ti OR 'botswana':ab,ti OR 'burkina faso':ab,ti OR 'burundi':ab,ti OR 'cameroon':ab,ti OR 'cabo verde':ab,ti OR 'central african republic':ab,ti OR 'chad':ab,ti OR 'comoros':ab,ti OR 'congo':ab,ti OR 'cote ivoire':ab,ti OR 'ivory coast':ab,ti OR 'eritrea':ab,ti OR 'ethiopia':ab,ti OR 'gabon':ab,ti OR 'gambia':ab,ti OR 'ghana':ab,ti OR 'guinea':ab,ti OR 'guinea-bissau':ab,ti OR 'kenya':ab,ti OR 'lesotho':ab,ti OR 'liberia':ab,ti OR 'madagascar':ab,ti OR 'malawi':ab,ti OR 'mali':ab,ti OR 'mauritania':ab,ti OR 'mauritius':ab,ti OR 'mozambique':ab,ti OR 'namibia':ab,ti OR 'niger':ab,ti OR 'nigeria':ab,ti OR 'rwanda':ab,ti OR 'sao tome and principe':ab,ti OR 'senegal':ab,ti OR 'seychelles':ab,ti OR 'sierra leone':ab,ti OR 'somalia':ab,ti OR 'south africa':ab,ti OR 'south sudan':ab,ti OR 'sudan':ab,ti OR 'swaziland':ab,ti OR 'tanzania':ab,ti OR 'togo':ab,ti OR 'uganda':ab,ti OR 'zambia':ab,ti OR 'zimbabwe':ab,ti OR 'low resource':ab,ti OR 'under resourced':ab,ti OR 'resource poor':ab,ti OR 'under developed':ab,ti OR 'underdeveloped':ab,ti OR 'developing country':ab,ti OR 'developing countries':ab,ti OR 'developing world':ab,ti OR 'third world':ab,ti OR lmic;ab,ti OR (low;ab,ti AND middle;ab,ti AND income;ab,ti) | 1,028,927 |
| 4. STEP 1     | #1 AND #2 AND #3                                                                                                                                                                                                                                                                                                                                                                                                                                                                                                                                                                                                                                                                                                                                                                                                                                                                                                                                                                                                                                                                                                                                                                                                                                                                                                                                                                                                                                                                                                                                                                                                                                                                                                                                                                                                                                                                                                                                                                                                                                                                                                                                                                                                                                                                                                                                                                                                                                                                                                                                                                                                                                                                                                                                                                                                                                                                                                                                                                                                                                                                                                                                                                                                                                                                     | 19,208    |
| 5. Econ       | 'economic aspect'/exp OR 'economic aspect' OR 'life year':ab,ti OR 'life years':ab,ti OR cost;ab,ti OR costs;ab,ti OR economic;ab,ti OR economics;ab,ti OR price;ab,ti OR income;ab,ti OR 'value of a statistical life':ab,ti OR vs;ab,ti OR daly;ab,ti OR financial;ab,ti OR fees;ab,ti OR fee;ab,ti OR expenditure;ab,ti OR expenditures;ab,ti OR expenses;ab,ti OR expense;ab,ti OR revenue;ab,ti OR salaries;ab,ti OR wage;ab,ti OR salary;ab,ti                                                                                                                                                                                                                                                                                                                                                                                                                                                                                                                                                                                                                                                                                                                                                                                                                                                                                                                                                                                                                                                                                                                                                                                                                                                                                                                                                                                                                                                                                                                                                                                                                                                                                                                                                                                                                                                                                                                                                                                                                                                                                                                                                                                                                                                                                                                                                                                                                                                                                                                                                                                                                                                                                                                                                                                                                                 | 1,543,164 |
| 6. STEP 2     | #4 AND #5                                                                                                                                                                                                                                                                                                                                                                                                                                                                                                                                                                                                                                                                                                                                                                                                                                                                                                                                                                                                                                                                                                                                                                                                                                                                                                                                                                                                                                                                                                                                                                                                                                                                                                                                                                                                                                                                                                                                                                                                                                                                                                                                                                                                                                                                                                                                                                                                                                                                                                                                                                                                                                                                                                                                                                                                                                                                                                                                                                                                                                                                                                                                                                                                                                                                            | 2,457     |

Database 3- Web of Science

| Set Number    | Search Terms for Web of Science                                                                                                                                                                                                                                                                                                                                                                                                                                                                                                                                                                                                                                                                                                                                                                                                                                                                                                                                                                                                                                                                                                                                                                                                                                                                                                                                                                                                                                                                                                                                                                                                                                                                                                                                                                                                                                                                                                                                                                                                                                                                                                                                                                                                                                                           | Results   |
|---------------|-------------------------------------------------------------------------------------------------------------------------------------------------------------------------------------------------------------------------------------------------------------------------------------------------------------------------------------------------------------------------------------------------------------------------------------------------------------------------------------------------------------------------------------------------------------------------------------------------------------------------------------------------------------------------------------------------------------------------------------------------------------------------------------------------------------------------------------------------------------------------------------------------------------------------------------------------------------------------------------------------------------------------------------------------------------------------------------------------------------------------------------------------------------------------------------------------------------------------------------------------------------------------------------------------------------------------------------------------------------------------------------------------------------------------------------------------------------------------------------------------------------------------------------------------------------------------------------------------------------------------------------------------------------------------------------------------------------------------------------------------------------------------------------------------------------------------------------------------------------------------------------------------------------------------------------------------------------------------------------------------------------------------------------------------------------------------------------------------------------------------------------------------------------------------------------------------------------------------------------------------------------------------------------------|-----------|
| 1. Pediatrics | 'pediatrics' OR 'juvenile' OR infant OR neonat* child OR children OR pediatric OR adolescent OR teenage OR teen OR teens OR youth OR youths OR kid OR kids                                                                                                                                                                                                                                                                                                                                                                                                                                                                                                                                                                                                                                                                                                                                                                                                                                                                                                                                                                                                                                                                                                                                                                                                                                                                                                                                                                                                                                                                                                                                                                                                                                                                                                                                                                                                                                                                                                                                                                                                                                                                                                                                | 1,716,232 |
| 2. Surgery    | 'surgery' OR 'inguinal hernia' OR 'hydrocele' OR 'cleft lip' OR 'cleft palate' OR 'cataract' OR 'anorectal malformation' OR 'surgery' OR 'surgical' OR surgically OR 'imperforate anus' OR 'cleft lip' OR 'cleft palate' OR hydrocele OR hernia OR cataract OR cataracts                                                                                                                                                                                                                                                                                                                                                                                                                                                                                                                                                                                                                                                                                                                                                                                                                                                                                                                                                                                                                                                                                                                                                                                                                                                                                                                                                                                                                                                                                                                                                                                                                                                                                                                                                                                                                                                                                                                                                                                                                  | 1,148,764 |
| 3. LMIC       | 'developing country' OR 'africa' OR 'central america' OR 'american samoa' OR 'cambodia' OR 'china' OR 'fiji' OR 'indonesia' OR 'kiribati' OR 'korea' OR 'lao' OR 'malaysia' OR 'marshall islands' OR 'micronesia' OR 'mongolia' OR 'myanmar' OR 'palau' OR 'papua new guinea' OR 'philippines' OR 'samoa' OR 'solomon islands' OR 'thailand' OR 'timor-leste' OR 'tuvalu' OR 'tonga' OR 'vanuatu' OR 'vietnam' OR 'albania' OR 'armenia' OR 'azerbaijan' OR 'belarus' OR 'bosnia' OR 'bulgaria' OR 'georgia' OR 'hungary' OR 'kazakhstan' OR 'kosovo' OR 'kyrgyz republic' OR 'macedonia' OR 'moldova' OR 'montenegro' OR 'romania' OR 'serbia' OR 'tajikistan' OR 'turkey' OR 'turkmenistan' OR 'ukraine' OR 'uzbekistan' OR 'argentina' OR 'belize' OR 'bolivia' OR 'brazil' OR 'colombia' OR 'costa rica' OR 'cuba' OR 'dominica' OR 'dominican republic' OR 'ecuador' OR 'el salvador' OR 'grenada' OR 'guatemala' OR 'guyana' OR 'haiti' OR 'honduras' OR 'jamaica' OR 'mexico' OR 'nicaragua' OR 'panama' OR 'paraguay' OR 'peru' OR 'st. lucia' OR 'st. vincent' OR 'suriname' OR 'venezuela' OR 'algeria' OR 'djibouti' OR 'egypt' OR 'iran' OR 'iraq' OR 'jordan' OR 'lebanon' OR 'libya' OR 'morocco' OR 'syria' OR 'tunisia' OR 'west bank and gaza' OR 'yemen' OR 'afghanistan' OR 'bangladesh' OR 'bhutan' OR 'india' OR 'maldives' OR 'nepal' OR 'pakistan' OR 'sri lanka' OR 'angola' OR 'benin' OR 'botswana' OR 'burkina faso' OR 'burundi' OR 'cameroon' OR 'cabo verde' OR 'central african republic' OR 'chad' OR 'comoros' OR 'congo' OR 'cote ivoire' OR 'ivory coast' OR 'eritrea' OR 'ethiopia' OR 'gabon' OR 'gambia' OR 'ghana' OR 'guinea' OR 'guinea-bissau' OR 'kenya' OR 'lesotho' OR 'liberia' OR 'madagascar' OR 'malawi' OR 'mali' OR 'mauritania' OR 'mauritius' OR 'mozambique' OR 'namibia' OR 'niger' OR 'nigeria' OR 'rwanda' OR 'sao tome and principe' OR 'senegal' OR 'seychelles' OR 'sierra leone' OR 'somalia' OR 'south africa' OR 'south sudan' OR 'sudan' OR 'swaziland' OR 'tanzania' OR 'togo' OR 'uganda' OR 'zambia' OR 'zimbabwe' OR 'low resource' OR 'under resourced' OR 'resource poor' OR 'under developed' OR 'underdeveloped' OR 'developing country' OR 'developing countries' OR 'developing world' OR 'third world' OR lmic | 2,499,993 |
| 4. STEP 1     | #1 AND #2 AND #3                                                                                                                                                                                                                                                                                                                                                                                                                                                                                                                                                                                                                                                                                                                                                                                                                                                                                                                                                                                                                                                                                                                                                                                                                                                                                                                                                                                                                                                                                                                                                                                                                                                                                                                                                                                                                                                                                                                                                                                                                                                                                                                                                                                                                                                                          | 5,082     |
| 5. Eeon       | 'economic aspect' OR 'economic aspect' OR 'life year' OR 'life years' OR cost OR costs OR economic OR economics OR price OR income OR 'value of a statistical life' OR vsl OR daly OR financial OR fees OR fee OR expenditure OR expenditures OR expenses OR expense OR revenue OR salaries OR wage OR salary                                                                                                                                                                                                                                                                                                                                                                                                                                                                                                                                                                                                                                                                                                                                                                                                                                                                                                                                                                                                                                                                                                                                                                                                                                                                                                                                                                                                                                                                                                                                                                                                                                                                                                                                                                                                                                                                                                                                                                             | 2,078,342 |
| 6. STEP 2     | #4 AND #5                                                                                                                                                                                                                                                                                                                                                                                                                                                                                                                                                                                                                                                                                                                                                                                                                                                                                                                                                                                                                                                                                                                                                                                                                                                                                                                                                                                                                                                                                                                                                                                                                                                                                                                                                                                                                                                                                                                                                                                                                                                                                                                                                                                                                                                                                 | 892       |
