# Supplementary material for: Economic Analysis of Children’s Surgical Care in Low- and Middle-Income Countries: A Systematic Review and Analysis
Source: PubMed Central journal article supplement (PMC5085034; doi:10.1371/journal.pone.0165480), 2016-10-28
Supplement: pone.0165480.s003.pdf [file pone.0165480.s003.pdf]

S2 Table Quality of Evidence using Drummond 10-Point Checklist

|                            | Drummond checklist question |   |   |   |    |    |    |    |     |    |   |   |    | Summary Score |
|----------------------------|-----------------------------|---|---|---|----|----|----|----|-----|----|---|---|----|---------------|
|                            | 1                           | 2 | 3 | 4 | 5a | 5b | 6a | 6b | 7a  | 7b | 8 | 9 | 10 |               |
| Evans et al. (2014)        | Y                           | N | N | Y | Y  | N  | Y  | N  | Y   | N  | N | N | Y  | 4.5           |
| Costa et al. (2014)        | Y                           | Y | Y | Y | Y  | Y  | Y  | Y  | N   | N  | Y | Y | Y  | 9             |
| Eeson et al. (2015)        | Y                           | Y | Y | Y | Y  | Y  | Y  | Y  | Y   | Y  | Y | Y | Y  | 10            |
| Davis et al. (2014)        | Y                           | N | Y | Y | Y  | Y  | Y  | Y  | N/A | Y  | N | N | Y  | 6.5           |
| Ramachandran et al. (2013) | Y                           | N | N | Y | Y  | N  | Y  | N  | N/A | N  | N | Y | N  | 4             |
| Ilbawi et al. (2013)       | Y                           | N | N | Y | Y  | Y  | Y  | Y  | N   | N  | N | N | Y  | 5             |
| Kerr et al. (2012)         | Y                           | N | N | N | Y  | N  | Y  | N  | Y   | N  | N | Y | Y  | 4.5           |
| Banu et al. (2013)         | N                           | N | N | Y | Y  | N  | N  | N  | N   | N  | N | N | N  | 1.5           |
| Zhu et al. (2013)          | Y                           | N | Y | Y | Y  | N  | Y  | N  | Y   | N  | N | N | N  | 4.5           |
| Wu et al. (2013)           | Y                           | N | N | Y | Y  | Y  | Y  | Y  | N   | N  | N | Y | Y  | 6             |
| Poenaru (2013)             | Y                           | N | N | Y | Y  | Y  | Y  | Y  | N   | Y  | N | Y | Y  | 6.5           |
| Shillcutt et al. (2013)    | Y                           | Y | Y | Y | Y  | Y  | Y  | Y  | Y   | Y  | Y | Y | Y  | 10            |
| Moon et al. (2012)         | Y                           | Y | Y | Y | Y  | Y  | Y  | Y  | Y   | Y  | N | Y | Y  | 9             |
| Dave et al. (2012)         | Y                           | Y | N | Y | Y  | Y  | Y  | Y  | Y   | N  | Y | N | Y  | 7.5           |
| Chen et al. (2012)         | Y                           | Y | Y | N | Y  | Y  | Y  | Y  | N/A | Y  | Y | N | Y  | 7.5           |
| Hughes et al. (2012)       | Y                           | Y | Y | Y | Y  | Y  | Y  | Y  | Y   | Y  | Y | N | Y  | 9             |
| Alkire et al. (2011)       | Y                           | Y | N | N | N  | Y  | N  | Y  | Y   | Y  | Y | Y | Y  | 7             |
| Gosselin et al. (2011)     | Y                           | N | N | N | Y  | Y  | N  | Y  | N/A | Y  | N | N | Y  | 4             |
| Shillcutt et al. (2010)    | Y                           | Y | N | Y | Y  | Y  | Y  | Y  | Y   | Y  | Y | Y | Y  | 9             |
| Gosselin et al. (2008)     | Y                           | Y | Y | Y | Y  | Y  | Y  | Y  | N/A | Y  | Y | N | Y  | 8.5           |
| Warf et al. (2011)         | Y                           | Y | Y | Y | Y  | Y  | Y  | Y  | Y   | Y  | N | Y | Y  | 9             |
| Allorto et al. (2011)      | Y                           | Y | N | N | Y  | N  | Y  | N  | N   | N  | N | N | N  | 3             |
| Mughal et al. (2011)       | Y                           | Y | N | N | Y  | N  | Y  | N  | N/A | N  | N | Y | Y  | 5             |
| Sadoh et al. (2011)        | Y                           | N | N | N | N  | N  | N  | N  | N/A | N  | N | N | N  | 1             |
| Zeinaloo et al. (2008)     | Y                           | Y | Y | N | Y  | N  | Y  | N  | N/A | N  | N | Y | N  | 5             |
| Chen et al. (2007)         | Y                           | Y | Y | Y | Y  | N  | Y  | N  | N   | N  | N | N | Y  | 6             |
| Pratap et al. (2007)       | Y                           | Y | Y | N | N  | N  | Y  | N  | N   | N  | N | Y | Y  | 5.5           |
| Prajna et al. (2007)       | Y                           | N | Y | Y | Y  | N  | Y  | N  | N/A | N  | N | Y | Y  | 6             |
| Tollefson et al. (2006)    | Y                           | N | Y | Y | Y  | N  | Y  | N  | N/A | N  | N | N | Y  | 5             |
| Vida et al. (2006)         | Y                           | Y | Y | Y | Y  | N  | Y  | N  | N   | N  | N | Y | Y  | 7             |
| Gangopadhyay et al. (2006) | Y                           | Y | Y | N | Y  | N  | Y  | N  | Y   | N  | N | N | Y  | 5.5           |
| Nursal et al. (2003)       | Y                           | N | Y | Y | N  | N  | N  | N  | N   | N  | N | N | Y  | 4             |
| Afaq et al. (2002)         | Y                           | Y | Y | N | Y  | N  | Y  | N  | N   | N  | N | N | N  | 4             |
| Manji et al. (2000)        | Y                           | N | Y | N | Y  | N  | Y  | N  | N   | N  | N | N | Y  | 4             |
| Asiedu et al. (1998)       | Y                           | Y | N | N | Y  | N  | Y  | N  | Y   | N  | N | N | Y  | 4.5           |
| Rattray et al. (2013)      | Y                           | N | N | Y | Y  | Y  | Y  | Y  | N/A | Y  | N | N | Y  | 5.5           |
| Liu et al. (2012)          | Y                           | Y | Y | Y | Y  | N  | Y  | N  | N   | N  | N | Y | Y  | 7             |

**Drummond checklist question**

|                              | <b>1</b> | <b>2</b> | <b>3</b> | <b>4</b> | <b>5a</b> | <b>5b</b> | <b>6a</b> | <b>6b</b> | <b>7a</b> | <b>7b</b> | <b>8</b> | <b>9</b> | <b>10</b> | <b>Summary Score</b> |
|------------------------------|----------|----------|----------|----------|-----------|-----------|-----------|-----------|-----------|-----------|----------|----------|-----------|----------------------|
| Baltussen et al. (2012)      | Y        | Y        | N        | Y        | Y         | Y         | Y         | Y         | Y         | Y         | Y        | Y        | Y         | 9                    |
| Hsu et al. (2009)            | Y        | Y        | Y        | N        | Y         | N         | Y         | N         | N         | N         | N        | N        | Y         | 5                    |
| Talwar et al. (2008)         | N        | N        | N        | N        | Y         | N         | Y         | N         | N         | N         | N        | Y        | N         | 2                    |
| Baltussen et al. (2005)      | Y        | Y        | Y        | Y        | Y         | Y         | Y         | Y         | Y         | Y         | N        | Y        | Y         | 9                    |
| Paudel et al. (2003)         | N        | N        | Y        | Y        | Y         | N         | Y         | N         | N/A       | N         | N        | Y        | N         | 4                    |
| Perveen et al. (2014)        | N        | Y        | Y        | N        | Y         | N         | N         | N         | N         | N         | N        | N        | N         | 2.5                  |
| Agarwal et al. (2010)        | Y        | N        | N        | N        | Y         | N         | Y         | N         | N/A       | N         | N        | N        | N         | 2                    |
| Adoga et al. (2010)          | Y        | Y        | N        | Y        | Y         | N         | Y         | N         | N         | N         | N        | N        | Y         | 5                    |
| Vida et al. (2007)           | Y        | Y        | Y        | Y        | Y         | N         | Y         | N         | N         | N         | N        | Y        | Y         | 7                    |
| Vida et al. (2006)           | Y        | Y        | Y        | Y        | Y         | N         | Y         | N         | N         | N         | N        | Y        | Y         | 7                    |
| Osuiigwe et al. (2006)       | Y        | Y        | Y        | N        | Y         | N         | N         | N         | N         | N         | N        | N        | Y         | 4.5                  |
| Dada et al. (2009)           | Y        | Y        | Y        | N        | Y         | N         | N         | N         | N         | N         | N        | N        | Y         | 4.5                  |
| Fandino-Franky et al. (2000) | Y        | N        | Y        | Y        | Y         | N         | Y         | N         | Y         | N         | N        | Y        | Y         | 6.5                  |
| Gurses et al. (2003)         | Y        | Y        | Y        | Y        | Y         | N         | Y         | N         | N         | N         | N        | Y        | N         | 6                    |
| Gogate et al. (2010)         | Y        | Y        | N        | Y        | Y         | N         | Y         | N         | N         | N         | N        | Y        | Y         | 6                    |
| Grimes et al. (2014)         | Y        | Y        | Y        | Y        | Y         | Y         | Y         | Y         | Y         | Y         | N        | Y        | Y         | 9                    |
| Gosselin et al. (2009)       | Y        | Y        | Y        | Y        | Y         | N         | Y         | N         | N         | N         | Y        | Y        | Y         | 8                    |
| Panni et al. (2011)          | Y        | Y        | Y        | Y        | Y         | N         | Y         | N         | Y         | N         | N        | Y        | Y         | 7.5                  |
| Reddy et al. (2009)          | Y        | N        | Y        | Y        | Y         | N         | Y         | N         | N/A       | N         | N        | N        | N         | 4                    |
| Alinia et al. (2013)         | Y        | N        | N        | Y        | N         | N         | N         | N         | N/A       | N         | N        | N        | Y         | 3                    |
| Gollogly et al. (2008)       | Y        | Y        | N        | Y        | N         | N         | N         | N         | N         | N         | N        | Y        | N         | 4                    |
| Ekenze et al. (2007)         | N        | N        | Y        | N        | Y         | N         | Y         | N         | N         | N         | N        | Y        | Y         | 4                    |
| Yang et al. (2010)           | Y        | Y        | Y        | Y        | Y         | N         | Y         | N         | N         | N         | N        | N        | Y         | 6                    |
| Gray et al. (2007)           | Y        | Y        | Y        | N        | Y         | Y         | Y         | Y         | N         | N         | N        | N        | Y         | 6                    |
| Rao et al. (2000)            | Y        | Y        | Y        | Y        | Y         | N         | Y         | N         | N         | N         | N        | N        | Y         | 6                    |
| Hong et al. (2008)           | N        | N        | Y        | N        | N         | N         | N         | N         | N         | N         | N        | Y        | Y         | 3                    |
| Utpal (2005)                 | Y        | Y        | Y        | N        | Y         | N         | Y         | N         | N/A       | N         | N        | N        | N         | 4                    |
| Binagwaho et al. (2010)      | Y        | Y        | Y        | Y        | Y         | Y         | Y         | Y         | Y         | Y         | Y        | Y        | Y         | 10                   |
| Tumwesigyea et al. (2013)    | Y        | Y        | Y        | Y        | Y         | Y         | Y         | Y         | N/A       | Y         | Y        | Y        | Y         | 9.5                  |
| Vasquez et al. (2009)        | N        | Y        | Y        | N        | Y         | N         | Y         | N         | N         | N         | N        | Y        | Y         | 5                    |
| Murithi et al. (2008)        | N        | N        | Y        | N        | Y         | N         | Y         | N         | N         | N         | N        | N        | Y         | 3                    |
| Akinyoola et al. (2011)      | Y        | Y        | Y        | Y        | Y         | N         | Y         | N         | N         | N         | N        | Y        | N         | 6                    |
| Adegbehingbe et al. (2010)   | N        | Y        | Y        | N        | Y         | N         | N         | N         | N         | N         | N        | N        | Y         | 3.5                  |
| Hodges et al. (2000)         | N        | N        | Y        | N        | Y         | N         | Y         | N         | N/A       | N         | N        | N        | N         | 2                    |
| Gradin et al. (2012)         | Y        | Y        | Y        | N        | Y         | N         | Y         | N         | N         | N         | N        | N        | Y         | 5                    |
| Wu et al. (2014)             | Y        | Y        | Y        | N        | Y         | N         | Y         | N         | N         | N         | N        | Y        | Y         | 6                    |

### Drummond checklist question

|                           | 1 | 2 | 3 | 4 | 5a | 5b | 6a | 6b | 7a  | 7b | 8 | 9 | 10 | Summary Score |
|---------------------------|---|---|---|---|----|----|----|----|-----|----|---|---|----|---------------|
| Chen et al. (2009)        | Y | Y | Y | N | Y  | N  | Y  | N  | N   | N  | N | Y | Y  | 6             |
| Sancaktutar et al. (2012) | Y | N | Y | N | Y  | N  | Y  | N  | N   | Y  | N | N | N  | 3.5           |
| Roux et al. (2007)        | N | Y | Y | N | Y  | N  | Y  | N  | N   | N  | N | N | N  | 3             |
| Padhi et al. (2007)       | Y | Y | Y | N | Y  | N  | Y  | N  | N   | N  | N | N | Y  | 5             |
| Hamamci et al. (2002)     | Y | Y | Y | Y | Y  | N  | Y  | N  | N   | N  | N | Y | Y  | 7             |
| Njeuhmeli et al. (2011)   | Y | Y | Y | Y | Y  | Y  | Y  | Y  | N/A | Y  | Y | Y | Y  | 9.5           |
| Magee et al. (2010)       | Y | Y | Y | N | Y  | Y  | Y  | Y  | N/A | Y  | N | Y | Y  | 7.5           |
| Gosselin et al. (2006)    | Y | Y | Y | Y | Y  | Y  | Y  | Y  | N/A | Y  | N | N | Y  | 7.5           |
| Corlew (2010)             | Y | Y | Y | Y | Y  | Y  | Y  | Y  | N/A | Y  | N | Y | Y  | 8.5           |
| Jha et al. (1998)         | Y | Y | Y | Y | Y  | Y  | Y  | Y  | Y   | Y  | N | N | Y  | 8             |
| Evans et al. (1996)       | Y | Y | Y | Y | Y  | Y  | Y  | Y  | Y   | Y  | Y | Y | Y  | 10            |
| Oucheng et al. (2010)     | N | N | Y | N | Y  | N  | N  | N  | N   | N  | N | N | N  | 1.5           |
| Wang et al. (2012)        | Y | Y | Y | N | Y  | Y  | Y  | Y  | N   | N  | N | Y | Y  | 7             |

Drummond checklist questions are: 1= Was a well-defined question posed in answerable form? 2= Was a comprehensive description of the competing alternatives given (i.e. can you tell who did what to whom, where, and how often)? 3=Was the effectiveness of the program or services established?; 4=Were all the important and relevant costs and consequences for each alternative identified?;5a=Were costs measured accurately in appropriate physical units (e.g. hours of nursing time, number of physician visits, lost work-days, gained life years)? 5b=Were consequences measured accurately in appropriate physical units (e.g. hours of nursing time, number of physician visits, lost work-days, gained life years)? 6a=Were the cost valued credibly?; 6b=Were the consequences valued credibly?;7a=Were costs adjusted for differential timing? 7b=Were consequences adjusted for differential timing? 8=Was an incremental analysis of costs and consequences of alternatives done?; 9=Was allowance made for uncertainty in the estimates of costs and consequences?; 10=Did the presentation and discussion of study results include all issues of concern to users?
