# Supplementary material for: Economic Analysis of Children’s Surgical Care in Low- and Middle-Income Countries: A Systematic Review and Analysis
Source: PubMed Central journal article supplement (PMC5085034; doi:10.1371/journal.pone.0165480), 2016-10-28
Supplement: pone.0165480.s004.pdf [file pone.0165480.s004.pdf]

**S3 Table. Costs of Pediatric Surgical Procedures**

|                                          | <b>Intervention</b>                                         | <b>Location</b> | <b>Currency</b>      | <b>Cost per outcome, as reported<sup>a</sup></b> | <b>Cost per outcome, 2015 USD<sup>b</sup></b> |
|------------------------------------------|-------------------------------------------------------------|-----------------|----------------------|--------------------------------------------------|-----------------------------------------------|
| <b>Cardiac Surgery</b>                   |                                                             |                 |                      |                                                  |                                               |
| Vida et al (2006) <sup>85</sup>          | Ventricular septal defect                                   | Guatemala       | 2005 USD             | \$3,787                                          | \$4,611                                       |
| Vida et al (2006) <sup>86</sup>          | Atrial septal defect: percutaneous occlusion                | Guatemala       | 2005 USD             | \$4,521                                          | \$5,505                                       |
|                                          | Atrial septal defect: surgical closure                      |                 |                      | \$3,330                                          | \$4,054                                       |
| Vida et al (2007) <sup>104</sup>         | Mediastinitis treatment: delayed sternal closure            | Guatemala       | 2005 USD             | \$9,612                                          | \$11,704                                      |
|                                          | Mediastinitis treatment: primary sternal closure            |                 |                      | \$2,467                                          | \$3,004                                       |
| Talwar et al (2008) <sup>87</sup>        | Atrial septal defect                                        | India           | 2007 Indian Rupee    | ₹21,000-70,000                                   | \$1,844-6,147                                 |
|                                          | Ventricular septal defect                                   |                 |                      | ₹23,000-75,000                                   | \$2,020-6,586                                 |
|                                          | Tetralogy of Fallot                                         |                 |                      | ₹24,000-80,000                                   | \$2,107-7,025                                 |
|                                          | Atrioventricular septal defect                              |                 |                      | ₹55,000                                          | \$4,830                                       |
|                                          | Fontan procedure                                            |                 |                      | ₹24,000-80,000                                   | \$2,107-7,025                                 |
|                                          | Arterial switch operation                                   |                 |                      | ₹27,000-90,000                                   | \$2,371-7,903                                 |
|                                          | Patent ductus arteriosus                                    |                 |                      | ₹6,000-18,000                                    | \$527-1,581                                   |
|                                          | Coarctation of aorta                                        |                 |                      | ₹7,000-22,000                                    | \$615-1,932                                   |
|                                          | Blalock-Taussig shunt                                       |                 |                      | ₹6,000-20,000                                    | \$526-1,756                                   |
|                                          | Totally anomalous pulmonary venous connection               |                 |                      | ₹65,000                                          | \$5,708                                       |
| Zeinaloo et al (2008) <sup>88</sup>      | Patent ductus arteriosus                                    | Iran            | 2005 USD             | \$1,697                                          | \$2,066                                       |
|                                          | Atrial septal defect                                        |                 |                      | \$2,739                                          | \$3,335                                       |
|                                          | Ventricular septal defect                                   |                 |                      | \$2,637                                          | \$3,211                                       |
| Chen et al (2009) <sup>89</sup>          | Patent ductus arteriosus: surgical closure                  | China           | 2007 Chinese Yuan    | ¥13,841                                          | \$4,882                                       |
|                                          | Patent ductus arteriosus: transcatheter Amplatzer occlusion |                 |                      | ¥18,709                                          | \$6,598                                       |
| Mughal et al (2011) <sup>90</sup>        | Open heart surgery                                          | Pakistan        | 2010 USD             | \$933                                            | \$1,018                                       |
|                                          | Closed heart surgery                                        |                 |                      | \$150                                            | \$163                                         |
|                                          | Angiographic interventions                                  |                 |                      | \$823                                            | \$897                                         |
| Panni et al (2011) <sup>91</sup>         | Congenital heart defects: age <1 year                       | Pakistan        | 2009 USD             | \$4,054                                          | \$4,494                                       |
|                                          | Congenital heart defects: age 1-5 years                     |                 |                      | \$5,548                                          | \$6,150                                       |
| Sadoh et al (2011) <sup>92</sup>         | Patent ductus arteriosus                                    | Nigeria         | 2009 USD             | \$4,000                                          | \$4,434                                       |
| Liu et al (2012) <sup>93</sup>           | Ventricular septal defect: percutaneous closure             | China           | 2011 USD             | \$3,870                                          | \$4,091                                       |
|                                          | Ventricular septal defect: surgical closure                 |                 |                      | \$4,583                                          | \$4,845                                       |
| Costa et al (2014) <sup>94</sup>         | Atrial septal defects: percutaneous closure                 | Brazil          | 2011 Brazil Real     | R\$19,267                                        | \$13,800                                      |
|                                          | Atrial septal defects: surgical closure                     |                 |                      | R\$12,431                                        | \$8,904                                       |
| <b>ENT</b>                               |                                                             |                 |                      |                                                  |                                               |
| Adoga et al (2010) <sup>99</sup>         | Chronic suppurative otitis media: middle ear reconstruction | Nigeria         | 2008 USD             | \$463                                            | \$511                                         |
| Kerr et al (2012) <sup>111</sup>         | Cochlear implantation                                       | South Africa    | 2010 S. African Rand | R298,961                                         | \$68,952                                      |
| Wu et al (2013) <sup>44</sup>            | Various ENT procedures                                      | Kenya           | 2011 USD             | \$354                                            | \$373                                         |
| <b>General Surgery</b>                   |                                                             |                 |                      |                                                  |                                               |
| Asiedu et al (1998) <sup>98</sup>        | Buruli ulcer                                                | Ghana           | 1996 USD             | \$659-967                                        | \$998-1,465                                   |
| Jha et al (1998) <sup>29</sup>           | Appendectomy <sup>e</sup>                                   | Guinea          | 1994 USD             | \$67                                             | \$107                                         |
|                                          | Inguinal hernia repair <sup>c</sup>                         |                 |                      | \$53                                             | \$85                                          |
| Afaq et al (2002) <sup>40</sup>          | Drainage of iliopsoas abscess                               | Nepal           | 2000 USD             | \$40                                             | \$55                                          |
| Hamamci et al (2002) <sup>107</sup>      | Laparoscopic splenectomy                                    | Turkey          | 2000 USD             | \$2,064 (\$1,767-2,687)                          | \$2,850 (\$2,440-3,711)                       |
|                                          | Open splenectomy                                            |                 |                      | \$1,664 (\$848-3,152)                            | \$2,298 (\$1,171-4,353)                       |
| Paudel et al (2003) <sup>30</sup>        | Appendectomy                                                | Nepal           | 2003 Nepalese Rupee  | Rs 2,485 (Rs 1,372-4,500)                        | \$178 (\$98-322)                              |
| Utpal (2005) <sup>31</sup>               | Laparoscopic appendectomy                                   | India           | 2005 Indian Rupee    | ₹925                                             | \$86                                          |
|                                          | Open appendectomy                                           |                 |                      | ₹923                                             | \$86                                          |
| Gangopadhyay et al (2006) <sup>28</sup>  | Posterior sagittal anorectoplasty: multi-stage procedure    | India           | 2003 Indian Rupee    | ₹19,000                                          | \$1,844                                       |
|                                          | Posterior sagittal anorectoplasty: single stage procedure   |                 |                      | ₹5,000                                           | \$485                                         |
| Gosselin et al (2006) <sup>36</sup>      | Various general surgery                                     | Sierra Leone    | 2004 USD             | \$43                                             | \$54                                          |
| Osugwe et al (2006) <sup>35</sup>        | Inguinal hernia repair                                      | Nigeria         | 2003 USD             | \$31-43                                          | \$40-56                                       |
| Chen et al (2007) <sup>108</sup>         | Laparoscopic splenectomy                                    | China           | 2006 USD             | \$871                                            | \$1,028                                       |
|                                          | Open splenectomy                                            |                 |                      | \$783                                            | \$924                                         |
| Pratap et al (2007) <sup>27</sup>        | Hirschsprung's repair: transanal endorectal pull-through    | Nepal           | 2005 Nepalese Rupee  | Rs5,000 (Rs3,500-8,000)                          | \$344 (\$241-550)                             |
| Hong et al (2008) <sup>105</sup>         | Laparoscopic choledochal cyst excision                      | China           | 2007 Chinese Yuan    | ¥19,167 (¥12,600-34,538)                         | \$6,760 (\$4,444-12,181)                      |
| Vasquez et al (2009) <sup>95</sup>       | Cystic echinococcosis                                       | Peru            | 2005 USD             | \$831 (\$564-1,610)                              | \$1,012 (\$687-1,960)                         |
| Shillcutt et al (2010) <sup>36</sup>     | Inguinal hernia repair                                      | Ghana           | 2008 USD             | \$120                                            | \$132                                         |
| Yang et al (2010) <sup>96</sup>          | Cystic echinococcosis                                       | China           | 2002 USD             | \$208-540                                        | \$275-714                                     |
| Sancaktutar et al (2012) <sup>110</sup>  | Removal of ureteral stents                                  | Turkey          | 2010 USD             | \$1,225 (\$330-3,800)                            | \$1,336 (\$360-4,144)                         |
| Wang et al (2012) <sup>97</sup>          | Cystic echinococcosis                                       | China           | 2008 USD             | \$1,493                                          | \$1,644                                       |
| Banu et al (2013) <sup>37</sup>          | Inguinal hernia repair                                      | Bangladesh      | 2011 USD             | \$21                                             | \$22                                          |
| Ilbawi et al (2013) <sup>50</sup>        | Various general surgery                                     | Cameroon        | 2007 USD             | \$215                                            | \$246                                         |
| Ramachandran et al (2013) <sup>106</sup> | Kidney transplantation                                      | India           | 2011 USD             | \$7,881 (\$2,151-23,792)                         | \$8,332 (\$2,274-25,153)                      |
| Shillcutt et al (2013) <sup>38</sup>     | Inguinal hernia repair                                      | Ecuador         | 2011 USD             | \$499                                            | \$526                                         |
| Wu et al (2013) <sup>44</sup>            | Various general surgery                                     | Kenya           | 2011 USD             | \$1,156                                          | \$1,218                                       |
| Wu et al (2014) <sup>32</sup>            | Appendectomy: single-site laparoscopic procedure            | China           | 2013 Chinese Yuan    | ¥12,282                                          | \$3,643                                       |
|                                          | Appendectomy: 3-port laparoscopic procedure                 |                 |                      | ¥12,187                                          | \$3,615                                       |
| Eeson et al (2015) <sup>39</sup>         | Inguinal hernia repair                                      | Uganda          | 2010 USD             | \$87                                             | \$95                                          |

|                                           | Intervention                                               | Location                    | Currency             | Cost per outcome, as reported <sup>a</sup> | Cost per outcome, 2015 USD <sup>b</sup> |
|-------------------------------------------|------------------------------------------------------------|-----------------------------|----------------------|--------------------------------------------|-----------------------------------------|
| <b>Neurosurgery</b>                       |                                                            |                             |                      |                                            |                                         |
| Fandino-Franky et al (2000) <sup>78</sup> | Epilepsy: corpus callosotomy                               | Colombia                    | 1999 USD             | \$3,137-3,995                              | \$4,478-5,702                           |
| Rao et al (2000) <sup>79</sup>            | Epilepsy: anterior temporal lobe lobectomy                 | India                       | 1998 USD             | \$1,200                                    | \$1,751                                 |
| Roux et al (2007) <sup>81</sup>           | Frontoethmoidal meningoencephalocoele repair               | Cambodia                    | 2006 USD             | \$380                                      | \$448                                   |
| Gollogly et al (2008) <sup>82</sup>       | Frontoethmoidal meningoencephalocoele repair               | Cambodia                    | 2007 USD             | \$300-500                                  | \$344-573                               |
| Oucheng et al (2010) <sup>83</sup>        | Frontoethmoidal meningoencephalocoele repair               | Cambodia                    | 2009 USD             | \$380                                      | \$421                                   |
| Warf et al (2011) <sup>86</sup>           | Hydrocephalus                                              | Uganda                      | 2005 USD             | \$746                                      | \$905                                   |
| Wu et al (2013) <sup>44</sup>             | Various neurological operations                            | Kenya                       | 2011 USD             | \$608                                      | \$641                                   |
| Davis et al (2014) <sup>87</sup>          | Various neurological operations                            | Guatemala                   | 2014 USD             | \$3,127                                    | \$3,131                                 |
| <b>Ophthalmology</b>                      |                                                            |                             |                      |                                            |                                         |
| Evans et al (1996) <sup>84</sup>          | Trichiasis surgery                                         | Burma                       | 1990 USD             | \$1,099                                    | \$1,993                                 |
| Baltussen et al (2005) <sup>85</sup>      | Trichiasis surgery                                         | Africa                      | 2000 Int. \$         | \$19                                       | \$26                                    |
|                                           |                                                            | Americas                    |                      | \$19                                       | \$26                                    |
|                                           |                                                            | Mediterranean               |                      | \$19                                       | \$26                                    |
|                                           |                                                            | Southeast Asia              |                      | \$19                                       | \$26                                    |
|                                           |                                                            | Western Pacific             |                      | \$19                                       | \$26                                    |
| Prajna et al (2007) <sup>84</sup>         | Corneal ulcers                                             | India                       | 2004USD              | \$86 (\$76-95)                             | \$108 (\$96-119)                        |
| Murithi et al (2008) <sup>82</sup>        | Ocular trauma                                              | Kenya                       | 2004 USD             | \$70 (\$4-497)                             | \$88 (\$5-626)                          |
| Agarwal et al (2010) <sup>80</sup>        | Cataract repair                                            | Various Africa <sup>c</sup> | 2007 USD             | \$340 (\$90-1,100)                         | \$390 (\$103-1,262)                     |
| Gogate et al (2010) <sup>81</sup>         | Cataract repair                                            | India                       | 2007 USD             | \$122-475                                  | \$140-545                               |
| Baltussen et al (2012) <sup>86</sup>      | Trichiasis surgery                                         | Sub-Saharan Africa          | 2005 Int. \$         | \$81                                       | \$98                                    |
|                                           | Cataract repair                                            |                             |                      | \$107                                      | \$130                                   |
|                                           | Trichiasis surgery                                         | Southeast Asia              |                      | \$575                                      | \$698                                   |
|                                           | Cataract repair                                            |                             |                      | \$9                                        | \$11                                    |
| Dave et al (2012) <sup>109</sup>          | Laser treatment for retinopathy of prematurity             | Peru                        | 2010 USD             | \$2,496                                    | \$2,722                                 |
| Gradin et al (2012) <sup>82</sup>         | Cataract repair                                            | Kenya                       | 2009 USD             | \$274-344                                  | \$304-381                               |
| Evans et al (2014) <sup>83</sup>          | Cataract repair                                            | Malawi                      | 2011 USD             | \$202                                      | \$214                                   |
|                                           |                                                            | Zambia                      |                      | \$277                                      | \$293                                   |
| <b>Orthopedics</b>                        |                                                            |                             |                      |                                            |                                         |
| Grimes et al (2014) <sup>87</sup>         | Various orthopedic procedures                              | Malawi                      | 2012 USD             | \$11-134                                   | \$11-138                                |
| Gurses et al (2003) <sup>68</sup>         | Pediatric trauma: major surgical treatment                 | Turkey                      | 1999 USD             | \$929 (\$63-1,995)                         | \$1,326 (\$90-2,848)                    |
|                                           | Pediatric trauma: minor procedures                         |                             |                      | \$355 (\$41-1,550)                         | \$506 (\$59-2,212)                      |
| Padhi et al (2007) <sup>74</sup>          | Open tibial injuries                                       | India                       | 2006 USD             | \$100                                      | \$118                                   |
| Gosselin et al (2008) <sup>69</sup>       | Various orthopedic procedures                              | Cambodia                    | 2006 USD             | \$117                                      | \$138                                   |
| Dada et al (2009) <sup>70</sup>           | Musculoskeletal injuries                                   | Nigeria                     | 2005 USD             | \$34-98                                    | \$41-119                                |
| Gosselin et al (2009) <sup>75</sup>       | Femoral shaft fractures                                    | Cambodia                    | 2008 USD             | \$888-1,107                                | \$981-1,223                             |
| Hsu et al (2009) <sup>76</sup>            | Femoral fractures: elastic intramedullary nailing          | Philippines                 | 2006 USD             | \$844                                      | \$996                                   |
|                                           | Femoral fractures: dynamic skeletal traction spica casting |                             |                      | \$216                                      | \$255                                   |
| Reddy et al (2009) <sup>71</sup>          | Various orthopedic injury procedures                       | India                       | 2004 USD             | \$104                                      | \$130                                   |
| Adegbehingbe et al (2010) <sup>83</sup>   | Ponseti clubfoot management                                | Nigeria                     | 2009 USD             | \$217                                      | \$240                                   |
| Akinyoola et al (2011) <sup>77</sup>      | Femoral shaft fractures                                    | Nigeria                     | 2007 USD             | \$51 (\$14-190)                            | \$59 (\$16-218)                         |
| Gosselin et al (2011) <sup>72</sup>       | Various orthopedic procedures                              | Nicaragua                   | 2010 USD             | \$1,483                                    | \$1,612                                 |
|                                           |                                                            | Dominican Republic          |                      | \$1,483                                    | \$1,612                                 |
|                                           |                                                            | Haiti                       |                      | \$1,201                                    | \$1,305                                 |
| Chen et al (2012) <sup>73</sup>           | Various orthopedic procedures                              | Nicaragua                   | 2010 USD             | \$711                                      | \$771                                   |
| Alinia et al (2013) <sup>103</sup>        | Amputation                                                 | Iran                        | 2009 USD             | \$3,471                                    | \$3,848                                 |
| Wu et al (2013) <sup>44</sup>             | Various orthopedic procedures                              | Kenya                       | 2011 USD             | \$368                                      | \$388                                   |
| Perveen et al (2014) <sup>84</sup>        | Ponseti clubfoot management                                | Bangladesh                  | 2011 USD             | \$38                                       | \$41                                    |
| <b>Plastic and Reconstructive Surgery</b> |                                                            |                             |                      |                                            |                                         |
| Hodges et al (2000) <sup>88</sup>         | Cleft lip & palate                                         | Uganda                      | 1999 British Pound   | £27                                        | \$160                                   |
| Nursal et al (2003) <sup>100</sup>        | Various burn injuries                                      | Turkey                      | 2001 USD             | \$7,716                                    | \$10,361                                |
| Tollefson et al (2006) <sup>59</sup>      | Cleft lip & palate                                         | China                       | 2004 USD             | \$1,590                                    | \$2,002                                 |
| Corlew (2010) <sup>60</sup>               | Cleft lip & palate                                         | Nepal                       | 2005 USD             | \$275                                      | \$334                                   |
| Magee Jr. et al (2010) <sup>61</sup>      | Cleft lip & palate                                         | Vietnam                     | 2008 USD             | \$86-230                                   | \$95-253                                |
|                                           |                                                            | Nicaragua                   |                      | \$631                                      | \$695                                   |
|                                           |                                                            | Kenya                       |                      | \$432                                      | \$476                                   |
| Allorto et al (2011) <sup>101</sup>       | Various burn injuries                                      | South Africa                | 2007 S. African Rand | R103,000-154,000                           | \$28,425-42,499                         |
| Moon et al (2012) <sup>64</sup>           | Cleft lip & palate                                         | Vietnam                     | 2010 USD             | \$335                                      | \$364                                   |
| Alinia et al (2013) <sup>103</sup>        | Burns, first degree                                        | Iran                        | 2009 USD             | \$599                                      | \$664                                   |
|                                           | Burns, second degree                                       |                             |                      | \$1,486                                    | \$1,647                                 |
|                                           | Burns, third degree                                        |                             |                      | \$4,342                                    | \$4,813                                 |
| Poenaru (2013) <sup>65</sup>              | Cleft lip & palate                                         | Africa                      | 2010 USD             | \$758                                      | \$824                                   |
|                                           |                                                            | Americas                    |                      | \$633                                      | \$688                                   |
|                                           |                                                            | Europe                      |                      | \$446                                      | \$485                                   |
|                                           |                                                            | Middle East                 |                      | \$867                                      | \$942                                   |
|                                           |                                                            | Southeast Asia              |                      | \$759                                      | \$825                                   |
|                                           |                                                            | Western Pacific             |                      | \$817                                      | \$888                                   |
| Rattray et al (2013) <sup>43</sup>        | Various reconstructive procedures                          | Cambodia                    | 2012 USD             | \$480                                      | \$496                                   |
| Wu et al (2013) <sup>44</sup>             | Various reconstructive procedures                          | Kenya                       | 2011 USD             | \$384                                      | \$405                                   |
| Zhu et al (2013) <sup>102</sup>           | Various burn injuries                                      | China                       | 2010 Chinese Yuan    | ¥4,253                                     | \$1,354                                 |

|                                      | Intervention                | Location                               | Currency     | Cost per outcome, as reported <sup>a</sup> | Cost per outcome, 2015 USD <sup>b</sup> |
|--------------------------------------|-----------------------------|----------------------------------------|--------------|--------------------------------------------|-----------------------------------------|
| <b>Urology</b>                       |                             |                                        |              |                                            |                                         |
| Manji (2000) <sup>46</sup>           | Circumcision                | Tanzania                               | 1998 USD     | \$15-20                                    | \$22-29                                 |
| Ekenze et al (2007) <sup>41</sup>    | Genital reconstruction      | Nigeria                                | 2005 USD     | \$120 (\$100-150)                          | \$146 (\$122-183)                       |
| Gray et al (2007) <sup>47</sup>      | Circumcision                | Uganda                                 | 2006 USD     | \$69                                       | \$81                                    |
| Binagwaho et al (2010) <sup>45</sup> | Circumcision                | Rwanda                                 | 2008 USD     | \$15                                       | \$17                                    |
| Njehumeli et al (2011) <sup>48</sup> | Circumcision                | Botswana                               | 2010 USD     | \$78 (\$62-94)                             | \$85 (\$68-102)                         |
|                                      |                             | Lesotho                                |              | \$84 (\$67-101)                            | \$91 (\$73-110)                         |
|                                      |                             | Malawi                                 |              | \$84 (\$67-101)                            | \$91 (\$73-110)                         |
|                                      |                             | Mozambique                             |              | \$86 (\$69-104)                            | \$94 (\$75-113)                         |
|                                      |                             | Namibia                                |              | \$87 (\$69-104)                            | \$94 (\$76-113)                         |
|                                      |                             | Kenya                                  |              | \$75 (\$60-90)                             | \$82 (\$65-98)                          |
|                                      |                             | Rwanda                                 |              | \$80 (\$64-96)                             | \$87 (\$70-105)                         |
|                                      |                             | South Africa                           |              | \$95 (\$76-114)                            | \$104 (\$83-125)                        |
|                                      |                             | Swaziland                              |              | \$75 (\$60-90)                             | \$82 (\$65-98)                          |
|                                      |                             | Tanzania                               |              | \$83 (\$66-99)                             | \$90 (\$72-108)                         |
|                                      |                             | Uganda                                 |              | \$66 (\$53-79)                             | \$72 (\$57-86)                          |
|                                      |                             | Zambia                                 |              | \$90 (\$72-108)                            | \$98 (\$78-117)                         |
|                                      |                             | Zimbabwe                               |              | \$78 (\$63-94)                             | \$85 (\$68-102)                         |
|                                      |                             | Tumwesigyea et al (2013) <sup>49</sup> | Circumcision | Uganda                                     | 2009 USD                                |
| Wu et al (2013) <sup>44</sup>        | Various urologic operations | Kenya                                  | 2011 USD     | \$713                                      | \$751                                   |

Abbreviations include: ENT ear, nose & throat; DALY disability-adjusted life-year; LYS life-year saved; LYG life-years gained; HALY health-adjusted QALY quality-adjusted life-year; USD United States dollar; Int. \$ International dollars (a hypothetical currency unit with the same purchasing power U.S. dollar has in the United States at a given time).

<sup>a</sup> Values converted to a per-procedure basis using information presented in article if not reported as such.

<sup>b</sup> Values converted to USD using purchasing power parity conversion factors from the World Bank<sup>16</sup> and inflated to 2015 USD using the Consumer Price calculator.<sup>17</sup>

<sup>c</sup> Includes South Africa, Malawi, Tanzania, Kenya, Uganda, Ethiopia, Sudan, Nigeria, Angola, Ghana, and Mali.
