# Supplementary material for: Economic Analysis of Children’s Surgical Care in Low- and Middle-Income Countries: A Systematic Review and Analysis
Source: PubMed Central journal article supplement (PMC5085034; doi:10.1371/journal.pone.0165480), 2016-10-28
Supplement: pone.0165480.s005.pdf [file pone.0165480.s005.pdf]

**S4 Table** Health Outcomes and Societal Economic Benefit of Pediatric Surgical Procedures

|                                           | <b>Intervention</b>                         | <b>Location</b>    | <b>Unit of outcome</b> | <b>Outcome per procedure</b> | <b>Economic benefit per procedure (published or calculated)<sup>a</sup></b> |
|-------------------------------------------|---------------------------------------------|--------------------|------------------------|------------------------------|-----------------------------------------------------------------------------|
| <b>Cardiac Surgery</b>                    |                                             |                    |                        |                              |                                                                             |
| Costa et al (2014) <sup>44</sup>          | Atrial septal defects: percutaneous closure | Brazil             | QALY                   | 19.74                        | <i>\$313,866</i>                                                            |
|                                           | Atrial septal defects: surgical closure     |                    | QALY                   | 19.71                        | <i>\$313,389</i>                                                            |
| <b>ENT</b>                                |                                             |                    |                        |                              |                                                                             |
| Wu et al (2013) <sup>44</sup>             | Various ENT procedures                      | Kenya              | DALY                   | 3-7.5                        | <i>\$8,670-21,675</i>                                                       |
| <b>General Surgery</b>                    |                                             |                    |                        |                              |                                                                             |
| Jha et al (1998) <sup>29</sup>            | Appendectomy                                | Guinea             | LYS                    | 1.86                         | <i>\$2,120</i>                                                              |
|                                           | Inguinal hernia repair                      |                    | LYS                    | 0.71                         | <i>\$814</i>                                                                |
| Gosselin et al (2006) <sup>26</sup>       | Various general surgery                     | Sierra Leone       | DALY                   | 1.31                         | <i>\$2,401</i>                                                              |
| Shillcutt et al (2010) <sup>36</sup>      | Inguinal hernia repair                      | Ghana              | DALY                   | 9.32-15.29                   | <i>\$36,907-60,548</i>                                                      |
| Wang et al (2012) <sup>37</sup>           | Cystic echinococcosis                       | China              | DALY                   | 1.03                         | <i>\$1,436</i>                                                              |
| Ilbawi et al (2013) <sup>50</sup>         | Various general surgery                     | Cameroon           | DALY                   | 7.9                          | <i>\$23,226</i>                                                             |
| Shillcutt et al (2013) <sup>38</sup>      | Inguinal hernia repair                      | Ecuador            | DALY                   | 6.39-10.79                   | <i>\$71,057-119,985</i>                                                     |
| Wu et al (2013) <sup>44</sup>             | Various general surgery                     | Kenya              | DALY                   | 10-24                        | <i>\$28,900-69,360</i>                                                      |
| Eeson et al (2015) <sup>39</sup>          | Inguinal hernia repair                      | Uganda             | DALY                   | 5.7-22                       | <i>\$9,633-37,180</i>                                                       |
| <b>Neurosurgery</b>                       |                                             |                    |                        |                              |                                                                             |
| Warf et al (2011) <sup>66</sup>           | Hydrocephalus                               | Uganda             | DALY                   | 11.74-19.94                  | <i>\$10,438-17,508</i>                                                      |
| Wu et al (2013) <sup>44</sup>             | Various neurological operations             | Kenya              | DALY                   | 9-24                         | <i>\$26,010-69,360</i>                                                      |
| Davis et al (2014) <sup>57</sup>          | Various neurological operations             | Guatemala          | DALY                   | 8.12                         | <i>\$58,977</i>                                                             |
| <b>Ophthalmology</b>                      |                                             |                    |                        |                              |                                                                             |
| Baltussen et al (2005) <sup>55</sup>      | Trichiasis surgery                          | Africa             | DALY                   | 1.43                         | <i>\$5,650</i>                                                              |
|                                           |                                             | Americas           | DALY                   | 1.43                         | <i>\$1,589</i>                                                              |
|                                           |                                             | Mediterranean      | DALY                   | 1.43                         | <i>\$18,337</i>                                                             |
|                                           |                                             | Southeast Asia     | DALY                   | 1.43                         | <i>\$7,753</i>                                                              |
|                                           |                                             | Western Pacific    | DALY                   | 1.43                         | <i>\$18,160</i>                                                             |
| <b>Orthopedics</b>                        |                                             |                    |                        |                              |                                                                             |
| Grimes et al (2014) <sup>67</sup>         | Various orthopedic procedures               | Malawi             | DALY                   | 1.4                          | <i>\$1,091</i>                                                              |
| Gosselin et al (2008) <sup>69</sup>       | Various orthopedic procedures               | Cambodia           | DALY                   | 4.23                         | <i>\$13,029</i>                                                             |
| Gosselin et al (2011) <sup>72</sup>       | Various orthopedic procedures               | Nicaragua          | DALY                   | 4.1                          | <i>\$35,118</i>                                                             |
|                                           |                                             | Dominican Republic | DALY                   | 4.1                          | <i>\$19,159</i>                                                             |
|                                           |                                             | Haiti              | DALY                   | 3.51                         | <i>\$6,134</i>                                                              |
| Chen et al (2012) <sup>73</sup>           | Various orthopedic procedures               | Nicaragua          | DALY                   | 0.99-2.64                    | <i>\$4,623-12,329</i>                                                       |
| Wu et al (2013) <sup>44</sup>             | Various orthopedic procedures               | Kenya              | DALY                   | 5-11                         | <i>\$14,450-31,790</i>                                                      |
| <b>Plastic and Reconstructive Surgery</b> |                                             |                    |                        |                              |                                                                             |
| Corlew (2010) <sup>60</sup>               | Cleft lip & palate                          | Nepal              | DALY                   | 2.5-16.6                     | <i>\$6,050-40,172</i>                                                       |
| Magee Jr. et al (2010) <sup>61</sup>      | Cleft lip & palate                          | Vietnam            | DALY                   | 0.27-11.63                   | <i>\$1,445-62,221</i>                                                       |
|                                           |                                             | Nicaragua          | DALY                   | 0.35-9.55                    | <i>\$1,611-44,599</i>                                                       |
|                                           |                                             | Kenya              | DALY                   | 0.36-4.50                    | <i>\$1,040-13,005</i>                                                       |
| Alkire et al (2011) <sup>62</sup>         | Cleft lip & palate                          | Sub-Saharan Africa | DALY                   | 3.33-7.42                    | <i>\$7,257-12,718</i>                                                       |
| Hughes et al (2012) <sup>63</sup>         | Cleft lip & palate                          | Ecuador            | DALY                   | 3.88-10.22                   | <i>\$24,357-66,100</i>                                                      |
| Moon et al (2012) <sup>64</sup>           | Cleft lip & palate                          | Vietnam            | DALY                   | 4.57-6.54                    | <i>\$24,450-34,989</i>                                                      |
| Poenaru (2013) <sup>65</sup>              | Cleft lip & palate                          | Africa             | DALY                   | 3.8-9                        | <i>\$15,048-35,640</i>                                                      |
|                                           |                                             | Americas           | DALY                   | 3.8-9                        | <i>\$113,696-269,279</i>                                                    |
|                                           |                                             | Europe             | DALY                   | 3.8-9                        | <i>\$70,478-166,920</i>                                                     |
|                                           |                                             | Middle East        | DALY                   | 3.8-9                        | <i>\$48,842-115,679</i>                                                     |
|                                           |                                             | Southeast Asia     | DALY                   | 3.8-9                        | <i>\$20,651-48,910</i>                                                      |
|                                           |                                             | Western Pacific    | DALY                   | 3.8-9                        | <i>\$57,544-136,287</i>                                                     |
| Ratray et al (2013) <sup>43</sup>         | Various reconstructive procedures           | Cambodia           | DALY                   | 5.2                          | <i>\$16,029</i>                                                             |
| Wu et al (2013) <sup>44</sup>             | Various reconstructive procedures           | Kenya              | DALY                   | 5-11.5                       | <i>\$14,450-33,235</i>                                                      |
| <b>Urology</b>                            |                                             |                    |                        |                              |                                                                             |
| Binagwaho et al (2010) <sup>45</sup>      | Circumcision                                | Rwanda             | LYG                    | 0.04                         | <i>\$69</i>                                                                 |
| Wu et al (2013) <sup>44</sup>             | Various urologic operations                 | Kenya              | DALY                   | 6-13                         | <i>\$17,340-37,570</i>                                                      |

Abbreviations include: ENT ear, nose & throat; DALY disability-adjusted life-year; LYS life-year saved; LYG life-year quality-adjusted life-year; GDP gross domestic product;

<sup>a</sup> Values in italics were calculated using the human capital approach by multiplying the upper and lower bound estimates the most recently published PPP GNI/capita estimates obtained from the World Bank.<sup>24</sup>
